# Supplementary material
Source: Springer Nature journal article supplement (https://www.springermedizin.de/resource/supplementary/12913_2010_1416_MOESM3_ESM.pdf/9528092)

—◆— Operating theatre personnel in Norway (n = 358)

—■— Hospital health care personnel in the United States [2] (n = 338,607)

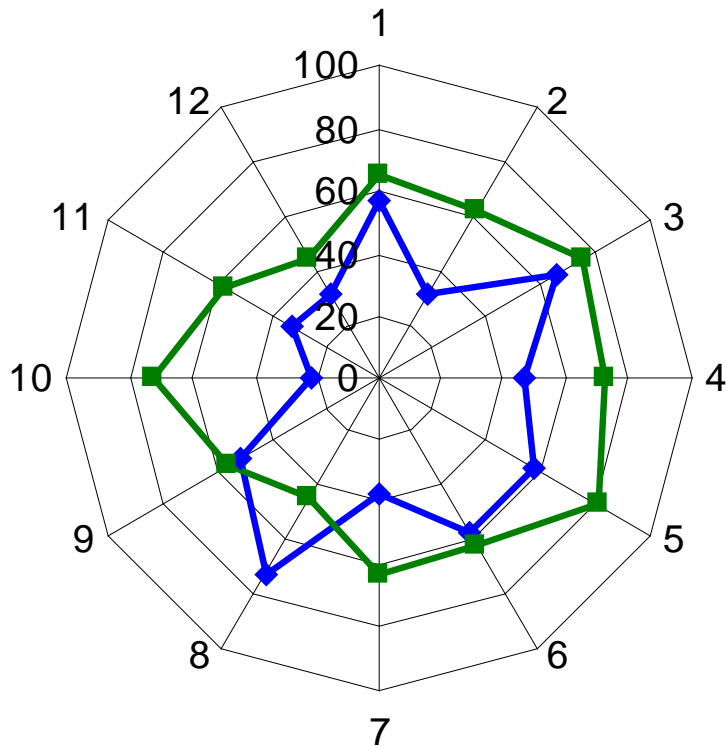

Supplement: MOESM3 [file 9528092]
